# Supplementary material
Source: PubMed Central journal article supplement (PMC8059878)
Supplement: mmc1.pdf [file mmc1.pdf]

# Electronic Supporting Information

## In Search of SARS CoV-2 Inhibitors as RNA Dependent RNA Polymerase and Main Protease inhibitors: Molecular Docking, ADMET Analysis and Molecular Dynamic Simulations

Normi D. Gajjar,<sup>a</sup> Tejas M. Dhameliya,<sup>a,\*</sup> Gaurang B. Shah<sup>a,\*</sup>

<sup>a</sup>L. M. College of Pharmacy, Navrangpura, Ahmedabad 380 009, Gujarat, India.

\*Corresponding Authors: E-mail: tejas.dhameliya@lmcp.ac.in (TMD),  
gaurang.shah@lmcp.ac.in (GBS). Tel: +91 79 2630 2746. Fax: +91 79 2630 4865.

### Table of Contents

|                                                                                                      |    |
|------------------------------------------------------------------------------------------------------|----|
| 1. Dataset for Selected Natural Products and their Derivatives.....                                  | 2  |
| Table S1. Selected natural products and their derivatives as ligands<br>for molecular modeling. .... | 2  |
| 2. Molecular Docking .....                                                                           | 23 |
| Table S2. Docking scores of compounds having docking score of $\leq$<br>-6.9 using SP module. ....   | 23 |
| 3. Analysis of Drug likeness of identified hits.....                                                 | 24 |
| Table S3. Lipinski rule analysis. <sup>a</sup> .....                                                 | 24 |
| 4. References.....                                                                                   | 25 |

# 1. Dataset for Selected Natural Products and their Derivatives

Table S1. Selected natural products and their derivatives as ligands for molecular modeling.

| Entry | 2-Dimensional Structure                                                             | Name          | Biological source         | Ref. |
|-------|-------------------------------------------------------------------------------------|---------------|---------------------------|------|
| 1     | 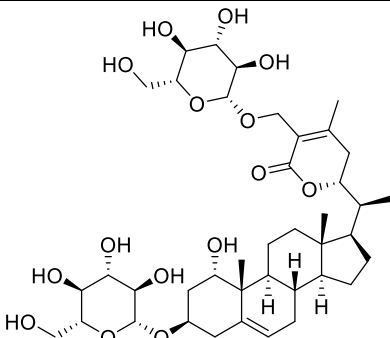   | Withanoside X | <i>Withania somnifera</i> | [1]  |
| 2     |   | Withanone     | <i>Withania somnifera</i> | [1]  |
| 3     |  | Withanolide N | <i>Withania somnifera</i> | [1]  |
| 4     |  | Withaferin A  | <i>Withania somnifera</i> | [1]  |
| 5     |  | Vasicin       | <i>Adhatoda vasaca</i>    | [2]  |
| 6     |  | Urosolic acid | <i>Ocimum tenuiflorum</i> | [1]  |

|    |                                                                                     |                           |                                 |     |
|----|-------------------------------------------------------------------------------------|---------------------------|---------------------------------|-----|
| 7  | 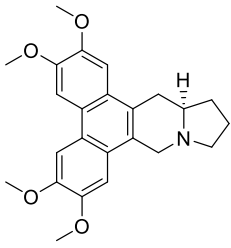   | Tylophorine               | <i>Tylophora indica</i>         | [3] |
| 8  |    | Tryptanthrine             | <i>Strobilanthes cusia</i>      | [4] |
| 9  |    | Tomentin D                | <i>Sphaeralcea angustifolia</i> | [3] |
| 10 |    | Tomentin C                | <i>Sphaeralcea angustifolia</i> | [3] |
| 11 |   | Tomentin B                | <i>Sphaeralcea angustifolia</i> | [3] |
| 12 |  | Tomentin A                | <i>Sphaeralcea angustifolia</i> | [3] |
| 13 |  | Theaflavin-3`-o-gallate   | <i>Camellia sinensis</i>        | [3] |
| 14 |  | Theaflavin-3,3`-digallate | <i>Camellia sinensis</i>        | [3] |

|    |  |                     |                                     |     |
|----|--|---------------------|-------------------------------------|-----|
| 15 |  | Tetrandrine         | <i>Stephania tetrandra</i>          | [3] |
| 16 |  | Tetrahydropalmatine | <i>Plants of corydalis genus</i>    | [5] |
| 17 |  | Tanshinone IIA      | <i>Salvia miltiorrhiza</i>          | [6] |
| 18 |  | Tanshinone I        | <i>Salvia miltiorrhiza</i>          | [3] |
| 19 |  | Tannic acid         | <i>Caesalpinia spinosa</i>          | [3] |
| 20 |  | Sulforaphane        | <i>Cruciferous vegetables</i>       | [7] |
| 21 |  | Sugiol              | <i>Metasequoia glyptostrobodies</i> | [8] |

|    |  |                   |                                    |
|----|--|-------------------|------------------------------------|
| 22 |  | Sitosterol        | <i>Tinospora cordifolia</i> [3]    |
| 23 |  | Sinigrin          | <i>Seeds of Brassica nigra</i> [3] |
| 24 |  | Simalikalactone D | <i>Simarouba tulae</i> [9]         |
| 25 |  | Silymarin         | <i>Silybum marianum</i> [10]       |
| 26 |  | Silvestrol        | <i>Aglaia silvestris</i> [3]       |
| 27 |  | Silibinin         | <i>Silybum marianum</i> [10]       |
| 28 |  | Shogaol           | <i>Zingiber officinale</i> [1]     |
| 29 |  | Sennoside A       | <i>Rheum palmatum</i> [11]         |
| 30 |  | Scutellarein      | <i>Erigeron breviscapus</i> [12]   |

|    |  |                 |                                   |
|----|--|-----------------|-----------------------------------|
| 31 |  | Schisandrin B   | <i>Schisandra chinensis</i> [10]  |
| 32 |  | Savinin         | <i>Pterocarpus santalinus</i> [3] |
| 33 |  | Salannine       | <i>Azadirachta indica</i> [12]    |
| 34 |  | Saikosaponin C  | <i>Bupleuri Radix</i> [3]         |
| 35 |  | Saikosaponin D  | <i>Bupleuri Radix</i> [3]         |
| 36 |  | Saikosaponin B2 | <i>Bupleuri Radix</i> [3]         |
| 37 |  | Saikosaponin A  | <i>Bupleuri Radix</i> [3]         |

|    |                                                                                     |                 |                                                                                  |      |
|----|-------------------------------------------------------------------------------------|-----------------|----------------------------------------------------------------------------------|------|
| 38 | 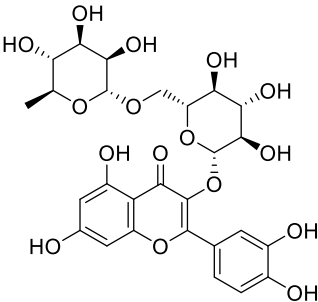   | Rutin           | <i>Ruta graveolens</i> ,<br><i>Tephrosia purpurea</i> ,<br><i>Eucalyptus sp.</i> | [3]  |
| 39 |    | Rosmariquinone  | <i>Rosmarinus officinalis</i>                                                    | [3]  |
| 40 |    | Rosmarinic acid | <i>Rosmarinus officinalis</i>                                                    | [13] |
| 41 |   | Brazilin        | <i>Caesalpinia sappan</i>                                                        | [14] |
| 42 |  | Rhein           | <i>Rheum undulatum</i>                                                           | [3]  |
| 43 |  | Retusin         | <i>Dipteryx odorata</i>                                                          | [15] |
| 44 |  | Quinic acid     | <i>Eucalyptus globulus</i>                                                       | [16] |
| 45 |  | Quercetrin      | <i>Allium cepa</i>                                                               | [3]  |

|    |                                                                                     |                                              |                             |      |
|----|-------------------------------------------------------------------------------------|----------------------------------------------|-----------------------------|------|
| 46 | 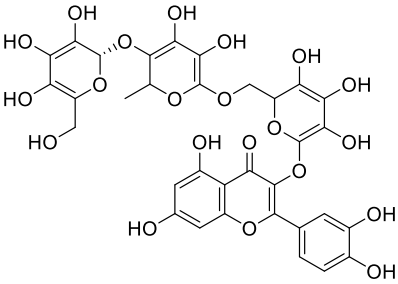   | Quercetin-3-O-galactosyl-rhamnosyl-glucoside | <i>Allium cepa</i>          | [17] |
| 47 |    | Quercetin                                    | <i>Allium cepa</i>          | [3]  |
| 48 |    | Quassin                                      | <i>Quassia amara</i>        | [9]  |
| 49 |   | Psoralidin                                   | <i>Psoralea corylifolia</i> | [3]  |
| 50 |  | Pseudohypericin                              | <i>Hypericum perforatum</i> | [18] |
| 51 |  | Procyanidin B1                               | <i>Vitis vinifera</i>       | [3]  |
| 52 |  | Procyanidin A2                               | <i>Vitis vinifera</i>       | [3]  |



|    |                                                                                     |                        |                                |      |
|----|-------------------------------------------------------------------------------------|------------------------|--------------------------------|------|
| 53 | 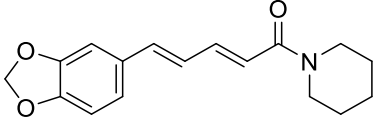   | Piperine               | <i>Piper nigrum</i>            | [1]  |
| 54 |    | Phlorofuocufuroeckol A | <i>Eisenia bicyclis</i>        | [3]  |
| 55 |    | Andrographolide        | <i>Andrographis paniculata</i> | [14] |
| 56 |   | Oubain                 | <i>Acokanthera schimperi</i>   | [3]  |
| 57 |  | Orientin               | <i>Ocimum sanctum</i>          | [19] |
| 58 |  | Octacosanol            | <i>Saccharum officinarum</i>   | [20] |
| 59 |  | Nimbolinin A           | <i>Azadirachta indica</i>      | [21] |
| 60 |  | Nimbin                 | <i>Azadirachta indica</i>      | [1]  |

|    |  |                        |                                 |      |
|----|--|------------------------|---------------------------------|------|
| 61 |  | Nictoflorin            | <i>Nyctanthes arbortristis</i>  | [1]  |
| 62 |  | Neobavaisoflavone      | <i>Psoralea corylifolia</i>     | [3]  |
| 63 |  | Myricetin              | <i>Solanum lycopersicum</i>     | [14] |
| 64 |  | Mycophenolate mofetile | <i>Panicillium stoloniferum</i> | [3]  |
| 65 |  | Naringenin             | <i>Citrus sp</i>                | [14] |
| 66 |  | Asiatic acid           | <i>Centella asiatica</i>        | [14] |
| 67 |  | Lycorine               | <i>Lycoris radiata</i>          | [3]  |
| 68 |  | Luteolin               | <i>Moringa oleifera</i>         | [3]  |

|    |                                                                                     |           |                                              |      |
|----|-------------------------------------------------------------------------------------|-----------|----------------------------------------------|------|
| 69 | 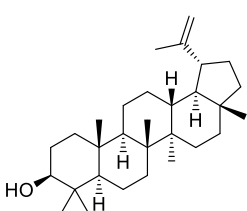   | Lupeol    | <i>Nyctanthes arbortristis</i>               | [1]  |
| 70 |    | Linalool  | <i>Family Lamiaceae, Lauraceae, Rutaceae</i> | [22] |
| 71 |    | Limonin   | <i>Citrus sp</i>                             | [23] |
| 72 |    | Brazilein | <i>Caesalpinia sappan</i>                    | [14] |
| 73 |    | Lignan    | <i>Linum usitatissimum</i>                   | [6]  |
| 74 |   | Lapachol  | <i>Tabebuia avellaneda</i>                   | [24] |
| 75 |  | Kazinol J | <i>Broussonetia kazinoki</i>                 | [3]  |
| 76 |  | Kazinol F | <i>Broussonetia kazinoki</i>                 | [3]  |
| 77 |  | Kazinol B | <i>Broussonetia kazinoki</i>                 | [3]  |

|    |                                                                                     |                 |                             |      |
|----|-------------------------------------------------------------------------------------|-----------------|-----------------------------|------|
| 78 | 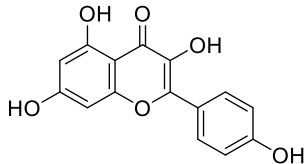   | Kaempferol      | <i>Psidium guajava</i>      | [6]  |
| 79 |    | Juglanin        | <i>Polygonum aviculare</i>  | [3]  |
| 80 |    | Isoquercitrin   | <i>Rheum nobile</i>         | [25] |
| 81 |   | Isobavachalcone | <i>Psoralea corylifolia</i> | [3]  |
| 82 |  | Indirubin       | <i>Isatis tinctoria</i>     | [26] |
| 83 |  | Hyperoside      | <i>Hypericum perforatum</i> | [18] |
| 84 |  | Hypericin       | <i>Hypericum perforatum</i> | [18] |

|    |                                                                                     |                               |                                              |      |
|----|-------------------------------------------------------------------------------------|-------------------------------|----------------------------------------------|------|
| 85 | 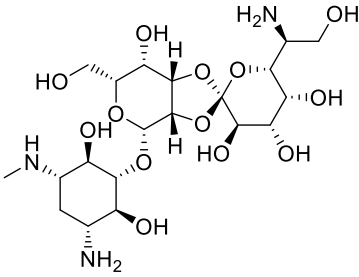   | Hygromycin B                  | <i>Streptomyces hygrosopicus</i>             | [3]  |
| 86 |    | Homoharringtonine             | <i>Cephalotaxus tree</i>                     | [3]  |
| 87 |   | Hippeastrum hybrid agglutinin |                                              | [27] |
| 88 |  | Hinokinin                     | <i>Species of Chamaecyparis, Zanthoxylum</i> | [3]  |
| 89 |  | Hesperatin                    | <i>Citrus sp.</i>                            | [3]  |
| 90 |  | Guttiferone                   | <i>Allanblackia stuhlmannii</i>              | [28] |

|    |                                                                                     |                      |                                  |
|----|-------------------------------------------------------------------------------------|----------------------|----------------------------------|
| 91 | 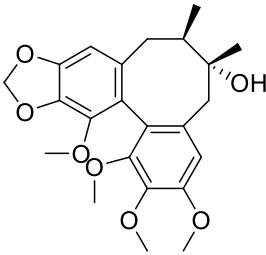   | Gomisin A            | <i>Schisandra chinensis</i> [29] |
| 92 |    | Glycyrrhizin         | <i>Lycoris radiata</i> [30]      |
| 93 |    | Gingerol             | <i>Zingiber officinale</i> [1]   |
| 94 |    | Geraniol             | <i>Rosa alba</i> [31]            |
| 95 |   | Gedunin              | <i>Azadirachta indica</i> [21]   |
| 96 |  | Gracinol             | <i>Garcinia parvifolia</i> [32]  |
| 97 |  | Galocatechin gallate | <i>Camellia sinensis</i> [3]     |
| 98 |  | Gallic acid          | <i>Rubus fruticosus</i> [33]     |

|     |                                                                                     |                            |                                                                                                                                      |      |
|-----|-------------------------------------------------------------------------------------|----------------------------|--------------------------------------------------------------------------------------------------------------------------------------|------|
| 99  | 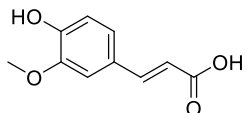   | Ferulic acid               | <i>Ananas comosus</i>                                                                                                                | [34] |
| 100 |    | Ferruginol                 | <i>Sequoia sempervirens</i>                                                                                                          | [3]  |
| 101 |    | Fangchinoline              | <i>Stephaniae tetrandrine</i>                                                                                                        | [3]  |
| 102 |    | Erythrodiol                | <i>Tripterygium wilfordi</i>                                                                                                         |      |
| 103 |   | Eriocitrin                 | <i>Citrus grandis</i> ,<br><i>Citrus limon</i> ,<br><i>Mentha longifolia</i> ,<br><i>Mentha piperita</i> ,<br><i>Thymus vulgaris</i> | [35] |
| 104 |  | Epigallocatechin-3-gallate | <i>Camellia sinensis</i>                                                                                                             | [36] |
| 105 |  | Epicatechin                | <i>Camellia sinensis</i>                                                                                                             | [36] |
| 106 |  | Emodin                     | <i>Polygonum cuspidatum</i>                                                                                                          | [37] |

|     |                                                                                     |                              |                                                   |      |
|-----|-------------------------------------------------------------------------------------|------------------------------|---------------------------------------------------|------|
| 107 | 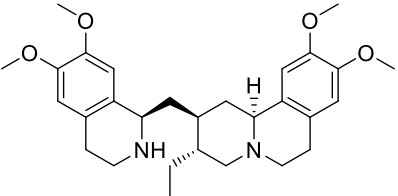   | Emetin                       | <i>Lagerstroemia speciosa</i>                     | [38] |
| 108 |    | Ellagic acid                 | <i>Fragaria ananassa</i>                          | [39] |
| 109 |    | Eckol                        | <i>Ecklonia maxima</i>                            | [3]  |
| 110 |   | Dihydrowithaferin A          | <i>Withania somnifera</i>                         | [40] |
| 111 |  | Dihydrotanshinone I          | <i>Salvia miltiorrhiza</i>                        | [6]  |
| 112 |  | Dihydro-gamma-linolenic acid | <i>Durio graveolens</i>                           | [6]  |
| 113 |  | Dieckol                      | <i>Ecklonia cava</i>                              | [3]  |
| 114 |  | Dicaffeoylquinic acid        | plant of Asteraceae family, <i>Coffea arabica</i> | [41] |
| 115 |  | Diallyl trisulfide           | <i>Allium sativum</i>                             | [17] |



|     |                                                                                     |                     |                                          |      |
|-----|-------------------------------------------------------------------------------------|---------------------|------------------------------------------|------|
| 116 | 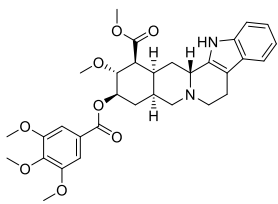   | Desmethoxyreserpine | <i>Rauvolfia serpentina</i>              | [6]  |
| 117 |    | Deoxyschisandrin    | <i>Schisandra chinensis</i>              | [10] |
| 118 |    | Curcumin            | <i>Curcuma longa</i>                     | [3]  |
| 119 |    | Cryptotenshinone    | <i>Salvia miltiorrhiza</i>               | [6]  |
| 120 |    | Coumaroyltyramine   | <i>Exochorda racemosa</i>                | [6]  |
| 121 |   | Coumaperine         | <i>Exochorda racemosa</i>                | [42] |
| 122 |  | Corylifol A         | <i>Psoralea corylifolia</i>              | [3]  |
| 123 |  | Clemastanin B       | <i>Clematis stans, Isatis indigotica</i> | [43] |
| 124 |  | Citronellol         | <i>citronella oils</i>                   | [22] |
| 125 |  | Cinnamatannin B1    | <i>Cinnamomum zeylanicum</i>             | [3]  |
| 126 |  | Cinanserin          |                                          | [3]  |

|     |                                                                                     |                  |                                                                                         |             |
|-----|-------------------------------------------------------------------------------------|------------------|-----------------------------------------------------------------------------------------|-------------|
| 127 | 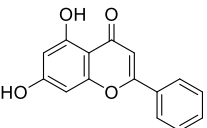   | Chrysin          | <i>Passiflora caerulea</i><br><i>and Passiflora incarnata</i> , <i>Oroxylum indicum</i> | [3]         |
| 128 |    | Choline          | <i>Glycine max</i>                                                                      | [44]        |
| 129 |    | Chlorogenic acid | <i>Coffea arabica</i>                                                                   | [41]        |
| 130 |    | Cepharanthine    | <i>Stephania cephalantha</i> Hayata                                                     | [3]         |
| 131 |    | Catechin gallate | <i>Uncaria sinensis</i> ,<br><i>Camera sinensis</i>                                     | [36]        |
| 132 |  | Catechin         | <i>Uncaria sinensis</i> ,<br><i>Camera sinensis</i>                                     | [14,<br>36] |
| 133 |  | Caryophyllin     | <i>Melissa officinalis</i>                                                              | [22]        |
| 134 |  | Caryophyllene    | <i>Melissa officinalis</i>                                                              | [22]        |
| 135 |  | Capsaicin        | <i>Capsicum annum</i>                                                                   | [45]        |
| 136 |  | Cannabinol       | <i>Cannabis sativa</i>                                                                  | [46]        |
| 137 |  | Cannabidiol      | <i>Cannabis sativa</i>                                                                  | [1]         |
| 138 |  | Caffeic acid     | <i>Coffea Arabica</i>                                                                   | [41]        |

|     |                                                                                     |                   |                                |      |
|-----|-------------------------------------------------------------------------------------|-------------------|--------------------------------|------|
| 139 | 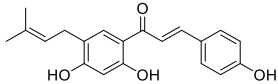   | Broussochalcone B | <i>Broussonetia papyrifera</i> | [3]  |
| 140 |    | Betulonic acid    | <i>Betula pubescens</i>        | [3]  |
| 141 |    | Betulinic acid    | <i>Betula pubescens</i>        | [3]  |
| 142 |    | Beta lapachone    | <i>Tabebuia avellaneda</i>     | [24] |
| 143 |   | Beta lapachol     | <i>Tabebuia avellaneda</i>     | [24] |
| 144 |  | Berberine         | <i>Tinospora cordifolia</i>    | [1]  |
| 145 |  | Berbamine         | <i>Tinospora cordifolia</i>    | [3]  |
| 146 |  | Bavachinin        | <i>Psoralea corylifolia</i>    | [3]  |
| 147 |  | Baicalin          | <i>Scutellaria baicalensis</i> | [47] |
| 148 |  | Baicalein         | <i>Scutellaria baicalensis</i> | [47] |

|     |                                                                                     |                   |                                                                       |      |
|-----|-------------------------------------------------------------------------------------|-------------------|-----------------------------------------------------------------------|------|
| 149 | 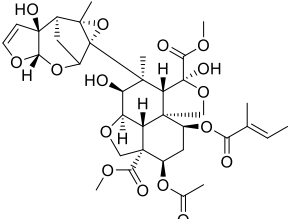   | Azadirachtin      | <i>Azadirachta indica</i>                                             | [21] |
| 150 |    | Astragalin        | <i>Nyctanthes arbortristis</i>                                        | [1]  |
| 151 |    | Ashwagandhanolide | <i>Withania somnifera</i>                                             |      |
| 152 |   | Artemisinin       | <i>Artemisia annua</i>                                                | [30] |
| 153 |  | Apigenin          | <i>Ocimum tenuiflorum</i>                                             | [3]  |
| 154 |  | Anthocyanins      | <i>Rubus fruticosus</i>                                               |      |
| 155 |  | Amentoflavone     | <i>Cassia fistula</i>                                                 | [3]  |
| 156 |  | Alpha-tocopherol  | <i>Oils from corn, cottonseed, soybean, safflower, and wheat germ</i> |      |
| 157 |  | Alpha-cadinol     | <i>Schisandra chinensis</i>                                           | [29] |

|     |                                                                                     |                                                      |                             |      |
|-----|-------------------------------------------------------------------------------------|------------------------------------------------------|-----------------------------|------|
| 158 | 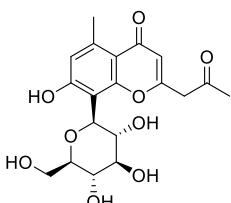   | Aloesin                                              | <i>Aloe barbadensis</i>     | [1]  |
| 159 |    | Aloenin                                              | <i>Aloe barbadensis</i>     | [1]  |
| 160 |    | Aloe emodin                                          | <i>Barbados aloe</i>        | [3]  |
| 161 |    | Allicin                                              | <i>Allium sativum</i>       | [17] |
| 162 |    | Alpha farnesene                                      | <i>oil of perilla</i>       | [22] |
| 163 |    | Ajoene                                               | <i>Allium Sativum</i>       | [17] |
| 164 |   | 7-Phloroeckol                                        | <i>Ecklonia bicyclis</i>    | [3]  |
| 165 |  | 7-Methoxycryptoleurine                               | <i>Boehmeria pannosa</i>    | [3]  |
| 166 |  | 6-geranyl-4',5,7-trihydroxy-3',5'-dimethoxyflavanone |                             | [3]  |
| 167 |  | 4'-O-Methylbavachalcone                              | <i>Psoralea corylifolia</i> | [3]  |
| 168 |  | 1,2,4,6-tetra-O-Galloyl- $\beta$ -D-glucose          | <i>Phyllanthus emblica</i>  | [3]  |
| 169 |  | ( <i>E,E</i> )-farnesol                              | <i>Cymbopogon citratus</i>  | [22] |

|     |                                                                                     |                                                                                                                                                                                     |                             |     |
|-----|-------------------------------------------------------------------------------------|-------------------------------------------------------------------------------------------------------------------------------------------------------------------------------------|-----------------------------|-----|
| 170 | 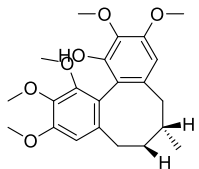   | Schisanthenol                                                                                                                                                                       | <i>Schisandra chinensis</i> | [3] |
| 171 |    | Halituna                                                                                                                                                                            | Genus <i>Cimicifuga</i>     | [3] |
| 172 |    | Shuangkangsu                                                                                                                                                                        | <i>Lonicera japonica</i>    | [3] |
| 173 |    | (2 <i>S</i> ,4 <i>aS</i> ,10 <i>aR</i> )-7-isopropyl-1,1,4 <i>a</i> -trimethyl-1,2,3,4,4 <i>a</i> ,10 <i>a</i> -hexahydrophenanthrene-2,6-diyl diacetate                            |                             | [3] |
| 174 |   | (4 <i>bS</i> ,8 <i>aS</i> ,10 <i>aR</i> )-10 <i>a</i> -hydroxy-2-isopropyl-4 <i>b</i> ,8,8-trimethyl-5,6,7,8,8 <i>a</i> ,9,10,10 <i>a</i> -octahydrophenanthren-3(4 <i>bH</i> )-one |                             | [3] |
| 175 |  | 1-(4,5-dihydroxy-3-(hydroxymethyl)cyclopent-2-en-1-yl)-1 <i>H</i> -1,2,3-triazole-4-carboxamide                                                                                     |                             | [3] |
| 176 |  | 1-(4,5-dihydroxy-3-(hydroxymethyl)cyclopent-2-en-1-yl)-1 <i>H</i> -1,2,4-triazole-3-carboxamide                                                                                     |                             | [3] |
| 177 |  | 1-(4,5-dihydroxy-3-(hydroxymethyl)cyclopent-2-en-1-yl)-1 <i>H</i> -imidazole-4-carboxamide                                                                                          |                             | [3] |

## 2. Molecular Docking

**Table S2. Docking scores of compounds having docking score of  $\leq -6.9$  using SP module.**

| Entry | Compounds                                                                                       | Docking score | PDB ID      |
|-------|-------------------------------------------------------------------------------------------------|---------------|-------------|
| 1     | Dieckol                                                                                         | -9.0          |             |
| 2     | Tannic acid                                                                                     | -8.4          | <b>6M71</b> |
| 3     | Theaflavin-3,3'-digallate                                                                       | -7.2          |             |
| 4     | Phlorofucofuroeckol A1                                                                          | -7.1          |             |
| 5     | Theaflavin-3,3'-digallate                                                                       | -8.3          |             |
| 6     | Rutin                                                                                           | -8.2          |             |
| 7     | 7-Phloroecol                                                                                    | -8.0          |             |
| 8     | Epigallocatechin-3-gallate                                                                      | -7.7          |             |
| 9     | Catechin                                                                                        | -7.4          |             |
| 10    | Phlorofucofuroeckol A                                                                           | -7.4          |             |
| 11    | Procyanidin A2                                                                                  | -7.4          |             |
| 12    | Dieckol                                                                                         | -7.3          |             |
| 13    | Procyanidin B1                                                                                  | -7.2          |             |
| 14    | Nictoflorin                                                                                     | -7.2          | <b>6Y2E</b> |
| 15    | Astragalin                                                                                      | -7.1          |             |
| 16    | Juglanin                                                                                        | -7.1          |             |
| 17    | Eckol                                                                                           | -7.1          |             |
| 18    | 1-(4,5-dihydroxy-3-(hydroxymethyl)cyclopent-2-en-1-yl)-1 <i>H</i> -1,2,4-triazole-3-carboxamide | -7.0          |             |
| 19    | Silibinin                                                                                       | -7.0          |             |
| 20    | 1-(4,5-dihydroxy-3-(hydroxymethyl)cyclopent-2-en-1-yl)-1 <i>H</i> -1,2,3-triazole-4-carboxamide | -7.0          |             |
| 21    | Hyperoside                                                                                      | -7.0          |             |
| 22    | Neobavaisoflavone                                                                               | -7.0          |             |

### 3. Analysis of Drug likeness of identified hits.

**Table S3. Lipinski rule analysis.<sup>a</sup>**

| Name of Compound               | MW <sup>b</sup> | HBA <sup>c</sup> | HBD <sup>d</sup> | LogP <sup>e</sup> | RB <sup>f</sup> |
|--------------------------------|-----------------|------------------|------------------|-------------------|-----------------|
| Dieckol                        | 742.55          | 11               | 11               | 0.994             | 6               |
| Theaflavin-3,3'-<br>digallate  | 866.69          | 18               | 13               | -0.956            | 8               |
| Phlorofuofucoeckol<br>A        | 602.46          | 9                | 9                | 1.137             | 4               |
| Rutin                          | 610.52          | 16               | 10               | -2.595            | 6               |
| 7-phloroeckol                  | 496.38          | 8                | 8                | 0.649             | 4               |
| Nictoflorin                    | 594.52          | 15               | 9                | -1.826            | 6               |
| Procyanidin A2                 | 576.51          | 12               | 9                | 0.301             | 2               |
| Hyperoside                     | 464.38          | 12               | 8                | -1.397            | 4               |
| Epigallocatechin-3-<br>Gallate | 458.37          | 10               | 8                | -0.251            | 4               |
| Juglanin                       | 418.35          | 10               | 6                | -0.318            | 4               |
| Eckol                          | 372.28          | 6                | 6                | 0.476             | 2               |
| Astragalin                     | 448.38          | 11               | 7                | -0.748            | 4               |
| Procyanidin B1                 | 578.52          | 12               | 10               | 0.461             | 3               |

<sup>a</sup>The parameters have been calculated using QikProp [48]. <sup>b</sup>Molecular weight (<500 Da), <sup>c</sup>Number of hydrogen bond acceptors (<10), <sup>d</sup>Number of hydrogen bond donors (<5), <sup>e</sup>Partition coefficient in oil to water (<5), <sup>f</sup>Number of rotational bonds (<5)



## 4. References

- [1] A.K. Srivastava, A. Kumar, N. Misra, On the inhibition of COVID-19 protease by Indian herbal Plants: An in silico investigation, Arxiv. (2020) 03411.
- [2] R. Chavan, D. Gohil, V. Shah, S. Kothari, A. Chowdhary, Anti-viral activity of indian medicinal plant *Justicia Adhatoda* against herpes simplex virus: An in-vitro study, *Int. J. Pharma Bio Sci.* 4 (2013) 769–778.
- [3] M.T. Islam, C. Sarkar, D.M. El-Kersh, S. Jamaddar, S.J. Uddin, J.A. Shilpi, M.S. Mubarak, Natural products and their derivatives against coronavirus: A review of the non-clinical and pre-clinical data, *Phytother. Res.* 34 (2020) 2471–2492.
- [4] Y.C. Tsai, C.L. Lee, H.R. Yen, Y.S. Chang, Y.P. Lin, S.H. Huang, C.W. Lin, Antiviral action of tryptanthrin isolated from *Strobilanthes cusia* leaf against human coronavirus NL63, *Biomolecules.* 10 (2020) 366.
- [5] H. Lixia, C. Jun, H. Song, Y. FaHu, T. Jinwen, Neuroprotective effect of (-)-tetrahydropalmatine in Japanese encephalitis virus strain GP-78 infected mouse model, *Microb. Pathog.* 114 (2018) 197–203.
- [6] D. hai Zhang, K. lun Wu, X. Zhang, S. qiong Deng, B. Peng, In silico screening of Chinese herbal medicines with the potential to directly inhibit 2019 novel coronavirus, *J. Integr. Med.* 18 (2020) 152–158.
- [7] Z. Li, Y. Liu, Z. Fang, L. Yang, M. Zhuang, Y. Zhang, H. Lv, Natural sulforaphane from broccoli seeds against influenza A virus replication in MDCK cells, *Nat. Prod. Commun.* 14 (2019) 1–8.
- [8] V.K. Bajpai, N.H. Kim, K. Kim, S.C. Kang, Antiviral potential of a diterpenoid compound sugiol from *Metasequoia glyptostroboides*, *Pak. J. Pharm. Sci.* 29 (2016) 1077–1080.
- [9] S. Apers, K. Cimanga, D. Vanden Berghe, E. Van Meenen, A. Otshudi Longanga, A. Foriers, A. Vlietinck, L. Pieters, Antiviral activity of simalikalactone D, a quassinoid from *Quassia africana*, *Planta Med.* 68 (2002) 20–24.

- [10] M. Pandit, N. Latha, In silico studies reveal potential antiviral activity of phytochemicals from medicinal plants for the treatment of COVID-19 infection, *Res. Sq.* (2020) 10.21203/rs.3.rs-22687/v1.
- [11] F. Esposito, I. Carli, C. Del Vecchio, L. Xu, A. Corona, N. Grandi, D. Piano, E. Maccioni, S. Distinto, C. Parolin, E. Tramontano, Sennoside A, derived from the traditional chinese medicine plant *Rheum L.*, is a new dual HIV-1 inhibitor effective on HIV-1 replication, *Phytomedicine*. 23 (2016) 1383–1391.
- [12] N. Sun, T. Yu, J.X. Zhao, Y.G. Sun, J.B. Jiang, Z.B. Duan, W.K. Wang, Y.L. Hu, H.M. Lei, H.Q. Li, Antiviral activities of natural compounds derived from traditional chinese medicines against porcine circovirus type 2 (PCV2), *Biotechnol. Bioprocess Eng.* 20 (2015) 180–187.
- [13] V. Swarup, J. Ghosh, S. Ghosh, A. Saxena, A. Basu, Antiviral and anti-inflammatory effects of rosmarinic acid in an experimental murine model of Japanese encephalitis, *Antimicrob. Agents Chemother.* 51 (2007) 3367–3370.
- [14] N.P. Linda Laksmiani, L.P. Febryana Larasanty, A.A.G. Jaya Santika, P.A. Andika Prayoga, A.A.I. Kharisma Dewi, N.P.A. Kristiara Dewi, Active compounds activity from the medicinal plants against SARS-CoV-2 using in silico assay, *Biomed. Pharmacol. J.* 13 (2020) 873–881.
- [15] R. Naithani, R.G. Mehta, D. Shukla, S.N. Chandrasekera, R.M. Moriarty, Antiviral Activity of Phytochemicals: A Current Perspective, in: *Diet. Components Immune Funct.*, Humana Press, 2010: pp. 421–468.
- [16] P.R. Zanello, A.C. Koishi, C.D.O. Rezende, L.A. Oliveira, A.A. Pereira, M.V. De Almeida, C.N. Duarte Dos Santos, J. Bordignon, Quinic acid derivatives inhibit dengue virus replication in vitro, *Virol. J.* 12 (2015) 1–13.
- [17] R. Harazem, S. Rahman, A. Kenawy, Evaluation of Antiviral Activity of *Allium Cepa* and *Allium Sativum* Extracts Against Newcastle Disease Virus, *Alexandria J. Vet. Sci.* 61 (2019) 108.
- [18] D.F. Birt, M.P. Widrlechner, K.D.P. Hammer, M.L. Hillwig, J. Wei, G.A. Kraus,

- P.A. Murphy, J.A. McCoy, E.S. Wurtele, J.D. Neighbors, D.F. Wiemer, W.J. Maury, J.P. Price, Hypericum in infection: Identification of anti-viral and anti-inflammatory constituents, *Pharm. Biol.* 47 (2009) 774–782.
- [19] K.Y. Lam, A.P.K. Ling, R.Y. Koh, Y.P. Wong, Y.H. Say, A review on medicinal properties of orientin, *Adv. Pharmacol. Sci.* 2016 (2016) 10.1155/2016/4104595.
- [20] S. Sengupta, I. Nandi, D.K. Bhattacharyya, M. Ghosh, Anti-oxidant and anti-bacterial properties of 1-octacosanol isolated from Rice Bran wax, *J. Plant Biochem. Physiol.* 6 (2018) 10.4172/2329-9029.1000206.
- [21] L. Badam, S.P. Joshi, S.S. Bedekar, “In vitro” antiviral activity of neem (*Azadirachta indica*. A. Juss) leaf extract against group B coxsackieviruses, *J. Commun. Dis.* 31 (1999) 79–90.
- [22] J.K.R. da Silva, P.L.B. Figueiredo, K.G. Byler, W.N. Setzer, Essential oils as antiviral agents. Potential of essential oils to treat SARS CoV-2 infection: An in-silico investigation, *Int. J. Mol. Sci.* 21 (2020) 10.3390/ijms21103426.
- [23] J.A. Nazhan, A.S.A. Majeed, A.H.H. Abd, Antiviral activity of arctigenin against newcastle disease virus in vitro, *Res. J. Chem. Environ.* 23 (2019) 68–76.
- [24] R.A. Higa, R.D. Aydos, I.S. Silva, R.T. Ramalho, A.S. de Souza, Study of the antineoplastic action of *Tabebuia avellanedae* in carcinogenesis induced by azoxymethane in mice, *Acta Cir. Bras.* 26 (2011) 125–128.
- [25] A. Gaudry, S. Bos, W. Viranaicken, M. Roche, P. Krejbich-Trotot, G. Gadea, P. Desprès, C. El-Kalamouni, The flavonoid isoquercitrin precludes initiation of Zika virus infection in human cells, *Int. J. Mol. Sci.* 19 (2018) 1–13.
- [26] S.J. Chang, Y.C. Chang, K.Z. Lu, Y.Y. Tsou, C.W. Lin, Antiviral activity of *Isatis indigotica* extract and its derived indirubin against Japanese encephalitis virus, *Evidence-Based Complement. Altern. Med.* 2012 (2012) 925830.
- [27] E. Keyaerts, L. Vijgen, C. Pannecouque, E. Van Damme, W. Peumans, H. Egberink, J. Balzarini, M. Van Ranst, Plant lectins are potent inhibitors of coronaviruses by interfering with two targets in the viral replication cycle, *Antiviral Res.* 75 (2007)

- 179–187.
- [28] R.M. Perez G., Antiviral activity of compounds isolated from plants, *Pharm. Biol.* 41 (2003) 107–157.
- [29] A. Szopa, M. Barnaś, H. Ekiert, Phytochemical studies and biological activity of three Chinese Schisandra species (*Schisandra sphenanthera*, *Schisandra henryi* and *Schisandra rubriflora*): current findings and future applications, *Phytochem. Rev.* 18 (2019) 109–128.
- [30] S.Y. Li, C. Chen, H.Q. Zhang, H.Y. Guo, H. Wang, L. Wang, X. Zhang, S.N. Hua, J. Yu, P.G. Xiao, R.S. Li, X. Tan, Identification of natural compounds with antiviral activities against SARS-associated coronavirus, *Antiviral Res.* 67 (2005) 18–23.
- [31] M. Mileva, I. Nikolova, N. Nikolova, L. Mukova, A. Georgieva, Investigation of Antioxidant and Antiviral Properties of Geraniol, *Acta Microbiol. Bulg.* 31 (2015) 48–53.
- [32] A. Adnan, Z.N. Allaudin, H. Hani, H.S. Loh, T.J. Khoo, K.N. Ting, R. Abdullah, Virucidal activity of *Garcinia parvifolia* leaf extracts in animal cell culture, *BMC Complement. Altern. Med.* 19 (2019) 1–10.
- [33] R.J. Danaher, C. Wang, J. Dai, R.J. Mumper, C.S. Miller, Antiviral effects of blackberry extract against herpes simplex virus type 1, *Oral Surg. Oral Med. Oral Pathol. Oral Radiol. Endod.* 112 (2011) e31–e35.
- [34] Z. Wang, D. Xie, X. Gan, S. Zeng, A. Zhang, L. Yin, B. Song, L. Jin, D. Hu, Synthesis, antiviral activity, and molecular docking study of trans-ferulic acid derivatives containing acylhydrazone moiety, *Bioorg. Med. Chem. Lett.* 27 (2017) 4096–4100.
- [35] R. Battistini, I. Rossini, C. Ercolini, M. Gorla, M.R. Callipo, C. Maurella, E. Pavoni, L. Serracca, Antiviral Activity of Essential Oils Against Hepatitis A Virus in Soft Fruits, *Food Environ. Virol.* 11 (2019) 90–95.
- [36] J. Xu, Z. Xu, W. Zheng, A review of the antiviral role of green tea catechins, *Molecules.* 22 (2017) 1337.

- [37] S. Schwarz, K. Wang, W. Yu, B. Sun, W. Schwarz, Emodin inhibits current through SARS-associated coronavirus 3a protein, *Antiviral Res.* 90 (2011) 64–69.
- [38] M.D. Bleasel, G.M. Peterson, Emetine, ipecac, ipecac alkaloids and analogues as potential antiviral agents for coronaviruses, *Pharmaceuticals.* 13 (2020) 51.
- [39] S.W. Park, M.J. Kwon, J.Y. Yoo, H.J. Choi, Y.J. Ahn, Antiviral activity and possible mode of action of ellagic acid identified in *Lagerstroemia speciosa* leaves toward human rhinoviruses, *BMC Complement. Altern. Med.* 14 (2014) 171.
- [40] M. Pant, T. Ambwani, V. Umapathi, Antiviral activity of Ashwagandha extract on infectious bursal disease virus replication, *Indian J. Sci. Technol.* 5 (2012) 2750–2751.
- [41] H. Utsunomiya, M. Ichinose, M. Uozaki, K. Tsujimoto, H. Yamasaki, A.H. Koyama, Antiviral activities of coffee extracts in vitro, *Food Chem. Toxicol.* 46 (2008) 1919–1924.
- [42] S. Thillaivanan, P. Parthiban, K. Kanakavalli, P. Sathiyarajeshwaran, A Review on “Kapa Sura Kudineer”-A Siddha Formulary Prediction for Swine Flu, *Int. J. Pharm. Sci. Drug Res.* 7 (2015) 376–383.
- [43] Z. Yang, Y. Wang, Z. Zheng, S. Zhao, J. Zhao, Q. Lin, C. Li, Q. Zhu, N. Zhong, Antiviral activity of *Isatis indigotica* root-derived clemastanin B against human and avian influenza A and B viruses in vitro, *Int. J. Mol. Med.* 31 (2013) 867–873.
- [44] J. De Bruijne, J. Van De Wetering De Rooij, A.A. Van Vliet, X.J. Zhou, M.F. Temam, J. Molles, J. Chen, K. Pietropaolo, J.Z. Sullivan-Bólyai, Mayers, H.W. Reesink, First-in-human study of the pharmacokinetics and antiviral activity of IDX375, a novel nonnucleoside hepatitis C virus polymerase inhibitor, *Antimicrob. Agents Chemother.* 56 (2012) 4525–4528.
- [45] T.A. Hafiz, M.A. Mubarak, M.A. Dkhil, S. Al-Quraishy, Antiviral activities of *Capsicum annum* methanolic extract against herpes simplex virus 1 and 2, *Pak. J. Zool.* 49 (2017) 267–272.
- [46] A.M. Tagne, B. Pacchetti, M. Sodergren, M. Sodergren, M. Cosentino, F. Marino,

- Cannabidiol for Viral Diseases: Hype or Hope?, *Cannabis Cannabinoid Res.* 5 (2020) 121–131.
- [47] Y. Lu, R. Joerger, C. Wu, Study of the chemical composition and antimicrobial activities of ethanolic extracts from roots of *Scutellaria baicalensis* Georgi, *J. Agric. Food Chem.* 59 (2011) 10934–10942.
- [48] Schrödinger Release 2020-3: QikProp, Schrödinger, LLC, New York, NY, (2020).
